# Supplementary material for: miR-27a and miR-27b regulate autophagic clearance of damaged mitochondria by targeting PTEN-induced putative kinase 1 (PINK1)
Source: PubMed Central journal article supplement (PMC4960690; doi:10.1186/s13024-016-0121-4), 2016-07-26

**A**

| Gene  | MicroRNA         | miRanda | miRWalk | RNAhybrid | Targetsan | Total prediction |
|-------|------------------|---------|---------|-----------|-----------|------------------|
| PINK1 | hsa-miR-516a-3p  | Y       | Y       | Y         | Y         | 4                |
| PINK1 | hsa-miR-346      | Y       | Y       | Y         | Y         | 4                |
| PINK1 | hsa-miR-548c-3p  | Y       | Y       | Y         | Y         | 4                |
| PINK1 | hsa-miR-124      | Y       | Y       | Y         | Y         | 4                |
| PINK1 | hsa-miR-1229     | Y       | Y       | Y         | Y         | 4                |
| PINK1 | hsa-miR-340      | Y       | Y       | Y         | Y         | 4                |
| PINK1 | hsa-miR-506      | Y       | Y       | Y         | Y         | 4                |
| PINK1 | hsa-miR-217      | Y       | Y       | Y         | Y         | 4                |
| PINK1 | hsa-miR-324-3p   | Y       | Y       | Y         | Y         | 4                |
| PINK1 | hsa-miR-486-5p   | Y       | Y       | Y         | Y         | 4                |
| PINK1 | hsa-miR-1205     | Y       | Y       | Y         | Y         | 4                |
| PINK1 | hsa-miR-532-3p   | Y       | Y       | Y         | Y         | 4                |
| PINK1 | hsa-miR-197      | Y       | Y       | Y         | Y         | 4                |
| PINK1 | hsa-miR-632      | Y       | Y       | Y         | Y         | 4                |
| PINK1 | hsa-miR-889      | Y       | Y       | Y         | Y         | 4                |
| PINK1 | hsa-miR-188-3p   | Y       | Y       | Y         | Y         | 4                |
| PINK1 | hsa-miR-1254     | Y       | Y       | Y         | Y         | 4                |
| PINK1 | hsa-miR-345      | Y       | Y       | Y         | Y         | 4                |
| PINK1 | hsa-miR-519e     | Y       | Y       | Y         | Y         | 4                |
| PINK1 | hsa-miR-455-3p   | Y       | Y       | Y         | Y         | 4                |
| PINK1 | hsa-miR-598      | Y       | Y       | Y         | Y         | 4                |
| PINK1 | hsa-miR-198      | Y       | Y       | Y         | Y         | 4                |
| PINK1 | hsa-miR-27b      | Y       | Y       | Y         | Y         | 4                |
| PINK1 | hsa-miR-216b     | Y       | Y       | Y         | Y         | 4                |
| PINK1 | hsa-miR-509-3-5p | Y       | Y       | Y         | Y         | 4                |
| PINK1 | hsa-miR-1260     | Y       | Y       | Y         | Y         | 4                |
| PINK1 | hsa-miR-515-3p   | Y       | Y       | Y         | Y         | 4                |
| PINK1 | hsa-miR-605      | Y       | Y       | Y         | Y         | 4                |
| PINK1 | hsa-miR-654-3p   | Y       | Y       | Y         | Y         | 4                |
| PINK1 | hsa-miR-1180     | Y       | Y       | Y         | Y         | 4                |
| PINK1 | hsa-miR-1292     | Y       | Y       | Y         | Y         | 4                |
| PINK1 | hsa-miR-431      | Y       | Y       | Y         | Y         | 4                |
| PINK1 | hsa-miR-568      | Y       | Y       | Y         | Y         | 4                |
| PINK1 | hsa-miR-27a      | Y       | Y       | Y         | Y         | 4                |
| PINK1 | hsa-miR-767-3p   | Y       | Y       | Y         | Y         | 4                |
| PINK1 | hsa-miR-380      | Y       | Y       | Y         | Y         | 4                |
| PINK1 | hsa-miR-1280     | Y       | Y       | Y         | Y         | 4                |
| PINK1 | hsa-miR-513a-5p  | Y       | Y       | Y         | Y         | 4                |
| PINK1 | hsa-miR-575      | Y       | Y       | Y         | Y         | 4                |
| PINK1 | hsa-miR-1236     | Y       | Y       | Y         | Y         | 4                |
| PINK1 | hsa-miR-513b     | Y       | Y       | Y         | Y         | 4                |
| PINK1 | hsa-miR-409-3p   | Y       | Y       | Y         | Y         | 4                |
| PINK1 | hsa-miR-513a-3p  | Y       | Y       | Y         | Y         | 4                |
| PINK1 | hsa-miR-588      | Y       | Y       | Y         | Y         | 4                |
| PINK1 | hsa-miR-626      | Y       | Y       | Y         | Y         | 4                |
| PINK1 | hsa-miR-205      | Y       | Y       | Y         | Y         | 4                |
| PINK1 | hsa-miR-142-5p   | Y       | Y       | Y         | Y         | 4                |
| PINK1 | hsa-miR-1238     | Y       | Y       | Y         | Y         | 4                |
| PINK1 | hsa-miR-1825     | Y       | Y       | Y         | Y         | 4                |
| PINK1 | hsa-miR-628-5p   | Y       | Y       | Y         | Y         | 4                |
| PINK1 | hsa-miR-509-5p   | Y       | Y       | Y         | Y         | 4                |
| PINK1 | hsa-miR-1200     | Y       | Y       | Y         | N         | 3                |
| PINK1 | hsa-miR-516a-3p  | Y       | Y       | N         | Y         | 3                |

Prediction  $\geq$   
4 algorithms

miRNAs  
in midbrain

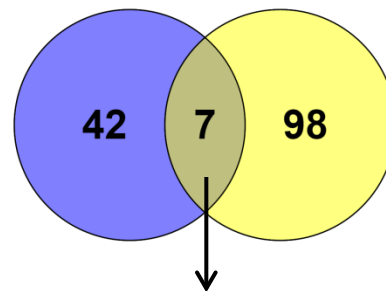

| MicroRNA    | Match number |
|-------------|--------------|
| hsa-miR-27a | 2            |
| hsa-miR-27b | 2            |
| hsa-miR-124 | 1            |
| hsa-miR-197 | 1            |
| hsa-miR-340 | 1            |
| hsa-miR-345 | 1            |
| hsa-miR-486 | 1            |

**B**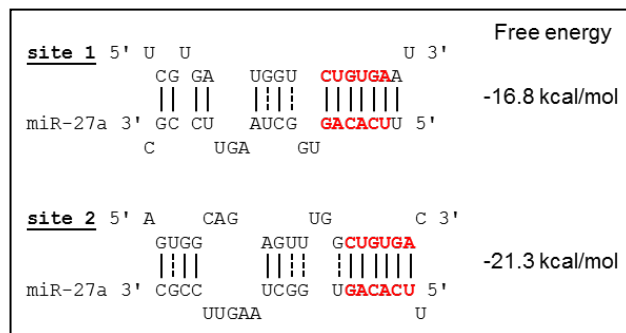

Supplement: 13024_2016_121_MOESM2_ESM.pdf [file 13024_2016_121_MOESM2_ESM.pdf]
