# Supplementary material for: miR-27a and miR-27b regulate autophagic clearance of damaged mitochondria by targeting PTEN-induced putative kinase 1 (PINK1)
Source: PubMed Central journal article supplement (PMC4960690; doi:10.1186/s13024-016-0121-4), 2016-07-26

**A**

|            |                                                                |     |            |                                                                    |     |  |
|------------|----------------------------------------------------------------|-----|------------|--------------------------------------------------------------------|-----|--|
| Human      | -----TGTCCTGCATGGAGCTGGTGAATTACTAAAAGAACATGG                   | 40  | Human      | --TACATGAGGCCTGGGCCTC-TGCCTTCCCAAGCTGTGCCTTCTGGACCAGCTACTGAA       | 491 |  |
| Chimpanzee | -----TGTCCTGCATGGAGCTGGTGAATTACTAAAAGAACATGG                   | 40  | Chimpanzee | --TACATGAGGCCTGGGCCTC-TGCCTTCCCAAGCTGTGCCTTCTGGACCAGCTACTGAA       | 491 |  |
| Monkey     | -----TGTCCTGCATGGAGCTGGTGAATTACTAAAAGAACATGG                   | 40  | Monkey     | CTGTGTTGAGGCCTGGGCCTC-TGTAATCCCAAGCTGTGTGTTCTGGACCAGCTACTGAA       | 505 |  |
| Rat        | -----TGTCCTGCATGGAGCTGGTGAATTACTAAAAGAACATGG                   | 40  | Rat        | -TTTGCCCATCTCTGGGCTAAATGCATTCTCAATGTCTAAACGCTTAAA--AGATGTCTATC     | 306 |  |
| Mouse      | TGGCCTCTGTGCTCCAGTTACTAAAAGACTAAGGGGCATCTGTGTCTGATGTCATGACAG   | 60  | Mouse      | -TTTACCAATTCTGGGCTAAATGCATTCTTTATGTCTAACTCTTTAA--AGATGCGAGC        | 523 |  |
|            |                                                                |     |            | * * * * * * * * * * * * * * * * * * * * * * * * * * * * * * * * *  |     |  |
| Human      | CATCCTCTGTGTCGTGATGGTCTGTGAATGGTGTGAGGTTGGGAGTCAGGAGACAAGACAGC | 100 | Human      | TTATTAATC---TCACTTAGCAAAAGTGACGGATGAGCAGTAAGTAAGTAAAGTGTGGGGA      | 548 |  |
| Chimpanzee | CATCCTCTGTGTCGTGATGGTCTGTGAATGGTGTGAGGTTGGGAGTCAGGAGACAAGACAGC | 100 | Chimpanzee | TTATTAATCACTCTCACTTAGCAAAAGTGACTGATGAGCAGTAAGTA---AGTGTGGGGA       | 547 |  |
| Monkey     | CATCCCGTGTGTCGTGATGGTCTGTGAATGGTGTGAGGTTGGGAGTCAGGAGACAAGATGGC | 100 | Monkey     | T---TAATC---TCACATAGCGAAAGTGACTGATGAGCAGTAAGT-----GTGGGGA          | 551 |  |
| Rat        | -----TGTCCTGCATGGAGCTGGTGAATTACTAAAAGAACATGG                   | 40  | Rat        | ATTAAGACAG-TCTCCAAGCCAAAGCCATG-----GTGGGGA                         | 336 |  |
| Mouse      | TATACGAAGGCTGAAGAAGTGGCTTGGCTGGTGGCAGGAGTCAGGGGACAAGCTGGA      | 120 | Mouse      | ATTAAGACAG-TCTCCATGCCAAA-----GTGGGGA                               | 547 |  |
|            |                                                                |     |            | * * * * * * * * * * * * * * * * * * * * * * * * * * * * * * * * *  |     |  |
| Human      | GCAGAGAGGGCTGGTTAGCCGGAAAAGCCCTCGGCCTTGGCAAATGGAAGAACTTTGAGTG  | 160 | Human      | TTTAAACTTGAGGGTTTCCCTCTGACTAGCCTCTCTTACAGGAATTTGAAATATTTAAA        | 608 |  |
| Chimpanzee | GCAGAGAGGGCTGGTTAGCCGGAAAAGCCCTCGGCCTTGGCAAATGGAAGAACTTTGAGTG  | 160 | Chimpanzee | TTTAAACTTGAGGGTTTCCCTCTGACTAGCCTCTCTTACAGGAATTTGAAATATTTAAA        | 607 |  |
| Monkey     | GCAGAGAGGGCTGGTTAGCCGGAAAAGCTTCAGGCTTGGCAAATGGAAGAACTTTGAGTG   | 160 | Monkey     | TTTAAACTTGAGGGTTTCCCTCTGACTAGCCTCTCTTACAGGAATTTGAAATATTTAAA        | 611 |  |
| Rat        | -----TGTCCTGCATGGAGCTGGTGAATTACTAAAAGAACATGG                   | 40  | Rat        | -----GTGGGGA                                                       | 336 |  |
| Mouse      | GTAGAGGGAGG-GGCTGGTCAAGCTTGGGCTCAGCAAATGGGAAGAAGCAGCCTTGAACAG  | 179 | Mouse      | -----GTGGGGA                                                       | 336 |  |
|            |                                                                |     |            | -----GTGGGGA                                                       | 336 |  |
| Human      | AGAGTTCAAGTCTGCAGTCTCTGTCTCACAGACATCTGAAAAGTGAATGGCCAAAGCTGGT  | 220 | Human      | TGCAAAATTTACAAGTGCAGATGACGTATGTGCCTTGAAGTGAATATTTGGCTTTAAGAAT      | 668 |  |
| Chimpanzee | AGAGTTCAAGTCTGCAGTCTCTGTCTCACAGACATCTGAAAAGTGAATGGCCAAAGCTGGT  | 220 | Chimpanzee | TGCAAAATTTACAAGTGCAG-----GTGGGGA                                   | 627 |  |
| Monkey     | AGAGTTCAAGTCTGCAGTCTCTGTCTCACAGACATCTGAAAAGTGAATGGCCAAAGCTGGT  | 220 | Monkey     | TGCAAAATTTACAAGTGCAG-----GTGGGGA                                   | 629 |  |
| Rat        | -----ACAGTCAAC-TACCTATGCCATCC---ATCTAAGTCTTAGGGCAGAAC          | 44  | Rat        | -----GTGGGGA                                                       | 336 |  |
| Mouse      | CTCAGGAGGGAGAGAGGCGAC-TACCTGTGCCGTCC---AGTTAGGTTCTTGGGCAAGT    | 235 | Mouse      | -----GTGGGGA                                                       | 336 |  |
|            |                                                                |     |            | ** * * * * * * * * * * * * * * * * * * * * * * * * * * * * * * * * |     |  |
| Human      | TAGTAGATGAGGCTGGACTGAGGAGGGGTAGGCTGCAT---CCACAGAGAGGATCCAG     | 276 | Human      | GATTCTTATACTCTGAAGGTGAGAATAATTTGTGGGCAGGTATCAACATTTGGGGAAGAGA      | 728 |  |
| Chimpanzee | TAGTAGATGAGGCTGGACTGAGGAGGGGTAGGCTGCAT---CCACATAGAGGATCCAG     | 276 | Chimpanzee | -----GTGGGGA                                                       | 336 |  |
| Monkey     | TAGTAGATGAGGCTGGACTGAGGAGGGGTAGGCTGCAT---CCACATAGAGGATCCAG     | 276 | Monkey     | -----GTGGGGA                                                       | 336 |  |
| Rat        | TCAGACGTCAGGCCAGACCAGGATCAGTAAC-TGTA-----CAGGAAATTAAG          | 93  | Rat        | -----GTGGGGA                                                       | 336 |  |
| Mouse      | TAGACATCAGGCCAGACCAGGATTTGGTAAGC-TATAGGAGGGCCAGACGGGAATGAAG    | 294 | Mouse      | -----GTGGGGA                                                       | 336 |  |
|            |                                                                |     |            | * * * * * * * * * * * * * * * * * * * * * * * * * * * * * * * * *  |     |  |
| Human      | GC---CAAGGCACTGGCTGTCA--GTGGCAGAGTTT-GGCTGTGA CCTT--TGCCCTA    | 327 | Human      | TTTCATGTCTAACTAACTAACTTTATACATGATTTTATAGGAAGCTATTGCCATAAATCAGC     | 788 |  |
| Chimpanzee | GC---CAAGGCACTGGCTGTCA--GTGGCAGAGTTT-GGCTGTGA CCTT--TGCCCTA    | 327 | Chimpanzee | -----GTGGGGA                                                       | 336 |  |
| Monkey     | GC---CAAGGCACTGGCTGTCA--GTGGCAGAGTTT-GGCTGTGA CCTT--TGCCCTA    | 327 | Monkey     | -----GTGGGGA                                                       | 336 |  |
| Rat        | TAGTTGTGATGACTTAGCTGTCACCGAGGCAGAAAG--GACAAAAC-----GGATG       | 142 | Rat        | -----GTGGGGA                                                       | 336 |  |
| Mouse      | TAGTTGTAATGACTAACCTATCACTAGGCCAAAGGCCAAGCAAGCACTGCACTGAGGCCA   | 354 | Mouse      | -----GTGGGGA                                                       | 336 |  |
|            |                                                                |     |            | * * * * * * * * * * * * * * * * * * * * * * * * * * * * * * * * *  |     |  |
| Human      | ACACGAGAACTCGTTTGAAGGGGGCA-GCGTAGCATGTCTG-ATTTGCCACCTGGATGA    | 385 | Human      | GTCAACATGCAGTAAAGGTTGTCTTCAACTGAAAAAAAAAAAAAAAAAAAAAAAAA           | 840 |  |
| Chimpanzee | ACACGAGAACTCGTTTGAAGGGGGCA-GCGTAGCATGTCTG-ATTTGCCACCTGGATGA    | 385 | Chimpanzee | -----GTGGGGA                                                       | 336 |  |
| Monkey     | ACATAGGAACTCGTTTGAAGGGGGCA-GCGTAGCATGTCTG-ATTTGCCACCTGGATGA    | 386 | Monkey     | -----GTGGGGA                                                       | 336 |  |
| Rat        | ACACT-GAACTTTACTTGTCCAC--TATACTCTTCTCATTTTTCCCGACCACTTAGAAAT   | 198 | Rat        | -----GTGGGGA                                                       | 336 |  |
| Mouse      | ACACT-GAACTTTGCTTGTCTCAATAAGTTTGTCTCATTTTTCCCAACCCTTAGAAAT     | 413 | Mouse      | -----GTGGGGA                                                       | 336 |  |
|            |                                                                |     |            | ** * * * * * * * * * * * * * * * * * * * * * * * * * * * * * * * * |     |  |
| Human      | AGGCAGACATCAACATGGGTCAGCAGC-----TTCAGTTACGGGAGTGGGAAAT-        | 434 |            |                                                                    |     |  |
| Chimpanzee | AGGCAGACATCAACATGGGTCAGCAGC-----TTCAGTTACGGGAGTGGGAAAT-        | 434 |            |                                                                    |     |  |
| Monkey     | AGGCAGCTATCAGCATGGGTCAGCAGCAGGACAGCACATTCAAGTTACAGGAGTGGGAAAC  | 446 |            |                                                                    |     |  |
| Rat        | GCAAAATAACCAAGTTAGTTTGAAGTGGC-----CAGTGTGGCTCAGCCAAAG-         | 249 |            |                                                                    |     |  |
| Mouse      | GCAAAACAT-AGGTTTAAATTTGAAGCAGCA-----ACCAGCATGCTCATAGTCAAAA-    | 466 |            |                                                                    |     |  |
|            |                                                                |     |            | * * * * * * * * * * * * * * * * * * * * * * * * * * * * * * * * *  |     |  |

**B**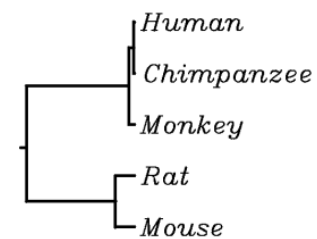

Supplement: 13024_2016_121_MOESM3_ESM.pdf [file 13024_2016_121_MOESM3_ESM.pdf]
