# Supplementary material for: miR-27a and miR-27b regulate autophagic clearance of damaged mitochondria by targeting PTEN-induced putative kinase 1 (PINK1)
Source: PubMed Central journal article supplement (PMC4960690; doi:10.1186/s13024-016-0121-4), 2016-07-26

**A**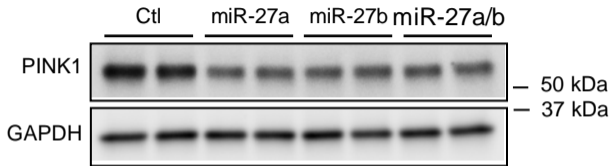**B**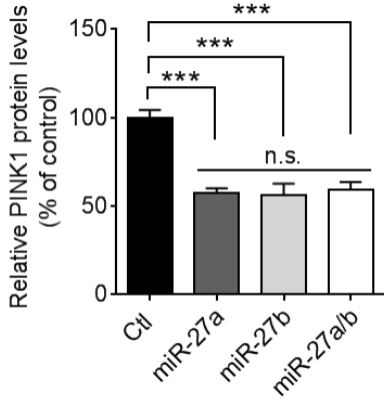

Supplement: 13024_2016_121_MOESM6_ESM.pdf [file 13024_2016_121_MOESM6_ESM.pdf]
